# Supplementary material for: Longitudinal Assessment of Cortical Motor Function in Amyotrophic Lateral Sclerosis
Source: Research Square preprint supplement (doi:10.21203/rs.3.rs-5816527/v1), 2025-05-06
Supplement: Supplementary file 1 [file d6150c6c73d89c5c3441be8b.docx]

*Supplementary Figure 1:* CONSORT DIAGRAM: Cohort study

**Longitudinal Assessment of Cortical Motor Function in Amyotrophic Lateral Sclerosis**

Assessed for eligibility (n=103)

Excluded

- Did not meet Gold Coast Criteria for diagnosis of ALS (n=35)
- Unmeasurable resting motor threshold (corticol inexcitability) (n=16)

>12 months from initial assessment (n=18)

- Bulbar (n=7)
- Limb (n=11)

Data not obtained (n=18)

Deceased (n=16)

>6 months from initial assessment (n=36)

- Bulbar (n=14)
- Limb (n=22)

Data not obtained (n=13)

Deceased (n=3)

<6 months from initial assessment (n=46)

- Bulbar (n=14)
- Limb (n=32)

Data not obtained (n=6)

Follow up

Included (n=52)

Enrolment
